# Supplementary material for: The Biological Properties of the SARS-CoV-2 Cameroon Variant Spike: An Intermediate between the Alpha and Delta Variants
Source: MDPI journal article supplement (doi:10.3390/pathogens11070814), 2022-07-20
Supplement: s1 [file s1]

**Supplementary Table S1.** Mutations of the Spike NTD of variants with respect to the reference Wuhan Spike, mutation  $\Delta\Delta G$  and domain net charge at pH=7.00 (last table line).

| Alpha          | Delta            | $\Delta\Delta G$<br>(kcal/mol) | Omicron          | $\Delta\Delta G$<br>(kcal/mol) | B.1.640.1        | $\Delta\Delta G$<br>(kcal/mol) | IHU<br>B.1.640.2 | $\Delta\Delta G$<br>(kcal/mol) |
|----------------|------------------|--------------------------------|------------------|--------------------------------|------------------|--------------------------------|------------------|--------------------------------|
| $\Delta 69-70$ | T19R             | -0.53                          | A67V             | -1.62                          | P9L              |                                | P9L              |                                |
| $\Delta 144$   | G142D            | 5.66                           | $\Delta 69-70$   | –                              | E96Q             | 1.32                           | E96Q             | 1.32                           |
|                | E156G            | 3.67                           | T95I             | -1.65                          | $\Delta 136-144$ | 4.31 <sup>a</sup>              | $\Delta 136-144$ | 4.31 <sup>a</sup>              |
|                | $\Delta 157-158$ |                                | G142D            | 5.91                           | R190S            | 3.97                           | R190S            | 3.97                           |
|                |                  |                                | $\Delta 143-145$ | –                              | I210T            | 2.87                           | D215H            | 2.03                           |
|                |                  |                                | $\Delta 211$     | –                              |                  |                                |                  |                                |
|                |                  |                                | L212I            | 0.27                           |                  |                                |                  |                                |
|                |                  |                                | +214EPE          | –                              |                  |                                |                  |                                |
| 1.2            | 1.6              |                                | -2.0             |                                | 2.6              |                                | 3.7              |                                |

a) This value refers to the substitution C136A that simulates the removal of the disulfide bridge upon deletion of the region 136-144.

**Supplementary Table S2.** B.1.640.1 mutations occurring in the Spike protein with respect to the reference Wuhan Spike protein. Structural context and interaction changes (added or removed) compared to those found in the reference 7SY1 Spike.

| <b>Mutations<sup>a</sup></b> | <b>Structural context</b>                                             | <b>Changed interactions</b>                                                                             |
|------------------------------|-----------------------------------------------------------------------|---------------------------------------------------------------------------------------------------------|
| E96Q                         | NTD; loop connecting two $\beta$ -strands                             | Removes the salt bridge with R190                                                                       |
| $\Delta$ 136-144             | NTD: strand of a $\beta$ -hairpin                                     | Removes a $\beta$ -strand and the disulfide bridge C15-C136. Possibly interacting with the AXL receptor |
| R190S                        | NTD; within the $\beta$ -strand encompassed by positions 188-197      | Removes the salt bridge with E96                                                                        |
| I210T                        | NTD: loop connecting two $\beta$ -strands                             | H-bond between side chain -OH and peptide CO of F186                                                    |
| R346S                        | RBD: loop connecting two $\alpha$ -helices                            |                                                                                                         |
| N394S                        | RBD: loop at the interface with the NTD of the other chain            |                                                                                                         |
| <b>Y449N</b>                 | RBD: loop connecting a short $\alpha$ -helix and a $\beta$ -strand.   | Removes H-bond with ACE2 D38                                                                            |
| <b>F490R</b>                 | RBD: within a loop                                                    | Possible weak salt bridge with ACE2 E35                                                                 |
| <b>N501Y</b>                 | RBD                                                                   | Interaction with ACE2 Y41 and K353                                                                      |
| D614G                        | S1                                                                    |                                                                                                         |
| P681H                        | S1: Exposed loop not visible in the reference structure.              |                                                                                                         |
| T859N                        | S2: within a $\beta$ -strand at the interface with the other subunit. | Forms a H-bond with N317 of the other subunit                                                           |
| D936H                        | S2 HR1: exposed side of an $\alpha$ -helix                            |                                                                                                         |

a) Residues at the interface with ACE2 are boldfaced

**Supplementary Table S3.** Variant mutations occurring in the Spike RBD with respect to the reference Wuhan Spike protein,  $\Delta\Delta G$  calculated with FoldX, and domain net charge at pH=7.00 (table last line). Text color marks shared mutations. Grey background denotes mutations at the RBD interface to ACE2. The mutation E484K is highlighted with blue, bold text.

| Alpha        | $\Delta\Delta G$<br>(kcal/mol) | Delta        | $\Delta\Delta G$<br>(kcal/mol) | Omicron      | $\Delta\Delta G$<br>(kcal/mol) | B.1.640.1    | $\Delta\Delta G$<br>(kcal/mol) | IHU<br>B.1.640.2 | $\Delta\Delta G$<br>(kcal/mol) |
|--------------|--------------------------------|--------------|--------------------------------|--------------|--------------------------------|--------------|--------------------------------|------------------|--------------------------------|
| <b>N501Y</b> | 1.2                            | L452R        | 0.2                            | G339D        | -1.0                           | R346S        | 1.1                            | R346S            | 1.1                            |
|              |                                | <b>T478K</b> | -0.2                           | S371L        | -0.3                           | N394S        | 0.4                            | N394S            | 0.4                            |
|              |                                |              |                                | S373P        | 4.2                            | Y449N        | 0.2                            | Y449N            | 0.2                            |
|              |                                |              |                                | S375F        | -0.3                           | F490R        | 1.2                            | <b>E484K</b>     | 0.5                            |
|              |                                |              |                                | K417N        | -0.2                           | <b>N501Y</b> | 2.0                            | <b>F490S</b>     | 2.1                            |
|              |                                |              |                                | N440K        | -0.4                           |              |                                | <b>N501Y</b>     | 2.0                            |
|              |                                |              |                                | G446S        | 3.0                            |              |                                |                  |                                |
|              |                                |              |                                | S477N        | 0.1                            |              |                                |                  |                                |
|              |                                |              |                                | <b>T478K</b> | -0.2                           |              |                                |                  |                                |
|              |                                |              |                                | E484A        | 1.0                            |              |                                |                  |                                |
|              |                                |              |                                | Q493R        | 0.2                            |              |                                |                  |                                |
|              |                                |              |                                | G496S        | -0.9                           |              |                                |                  |                                |
|              |                                |              |                                | Q498R        | 0.3                            |              |                                |                  |                                |
|              |                                |              |                                | <b>N501Y</b> | 1.2                            |              |                                |                  |                                |
|              |                                |              |                                | Y505H        | 0.7                            |              |                                |                  |                                |
| 2.6          |                                | 4.1          |                                | 5.2          |                                | 2.2          |                                | 3.2              |                                |

**Supplementary Table S4.** Comparison of the alanine scanning of the RBD-ACE2 complexes. The loss of interaction energy ( $\Delta\Delta G$ ) upon substitution of each interface residue with alanine is reported. Only mutated residues are displayed for B.1.640.1 and 2.

| <b>Alpha<br/>(B.1.1.7)</b> | <b><math>\Delta\Delta G</math><br/>(kcal/mol)</b> | <b>B.1.640.1</b> | <b><math>\Delta\Delta G</math><br/>(kcal/mol)</b> | <b>IHU<br/>B.1.640.2</b> | <b><math>\Delta\Delta G</math><br/>(kcal/mol)</b> |
|----------------------------|---------------------------------------------------|------------------|---------------------------------------------------|--------------------------|---------------------------------------------------|
| R403                       | 0.11                                              |                  | 0.11                                              |                          | 0.11                                              |
| K417                       | 0.19                                              |                  | 0.19                                              |                          | 0.19                                              |
| V445                       | 0.03                                              |                  | 0.03                                              |                          | 0.03                                              |
| Y449                       | 0.79                                              | N                | 0.00                                              | N                        | 0.16                                              |
| Y453                       | 0.86                                              |                  | 0.84                                              |                          | 0.84                                              |
| L455                       | 0.42                                              |                  | 0.42                                              |                          | 0.42                                              |
| F456                       | 0.55                                              |                  | 0.57                                              |                          | 0.57                                              |
| Y473                       | 0.22                                              |                  | 0.25                                              |                          | 0.25                                              |
| S477                       | 0.05                                              |                  | 0.05                                              |                          | 0.05                                              |
| E484                       | 0.12                                              |                  | 0.15                                              | K                        | 0.10                                              |
| F486                       | 0.86                                              |                  | 0.85                                              |                          | 0.85                                              |
| N487                       | 1.22                                              |                  | 1.25                                              |                          | 1.25                                              |
| Y489                       | 2.30                                              |                  | 2.16                                              |                          | 2.16                                              |
| F490                       | 0.10                                              | R                | 0.11                                              | S                        | 0.05                                              |
| Q493                       | 1.05                                              |                  | 1.06                                              |                          | 1.01                                              |
| S494                       | 0.09                                              |                  | 0.13                                              |                          | 0.18                                              |
| Y495                       | 0.09                                              |                  | 0.09                                              |                          | 0.09                                              |
| Q498                       | 0.57                                              |                  | 0.57                                              |                          | 0.57                                              |
| T500                       | 0.40                                              |                  | 0.32                                              |                          | 0.32                                              |
| Y501                       | 3.35                                              |                  | 3.18                                              |                          | 3.18                                              |
| V503                       | 0.03                                              |                  | 0.03                                              |                          | 0.03                                              |
| Y505                       | 3.81                                              |                  | 3.79                                              |                          | 3.79                                              |
